# Supplementary material for: Study on the Nutrient Optimal Management Strategy of High and Stable Annual Yield in the Rice–Wheat System: A 10-Year Term Experiment
Source: MDPI journal article supplement (doi:10.3390/agronomy12030698), 2022-03-14
Supplement: s1 [file s1]

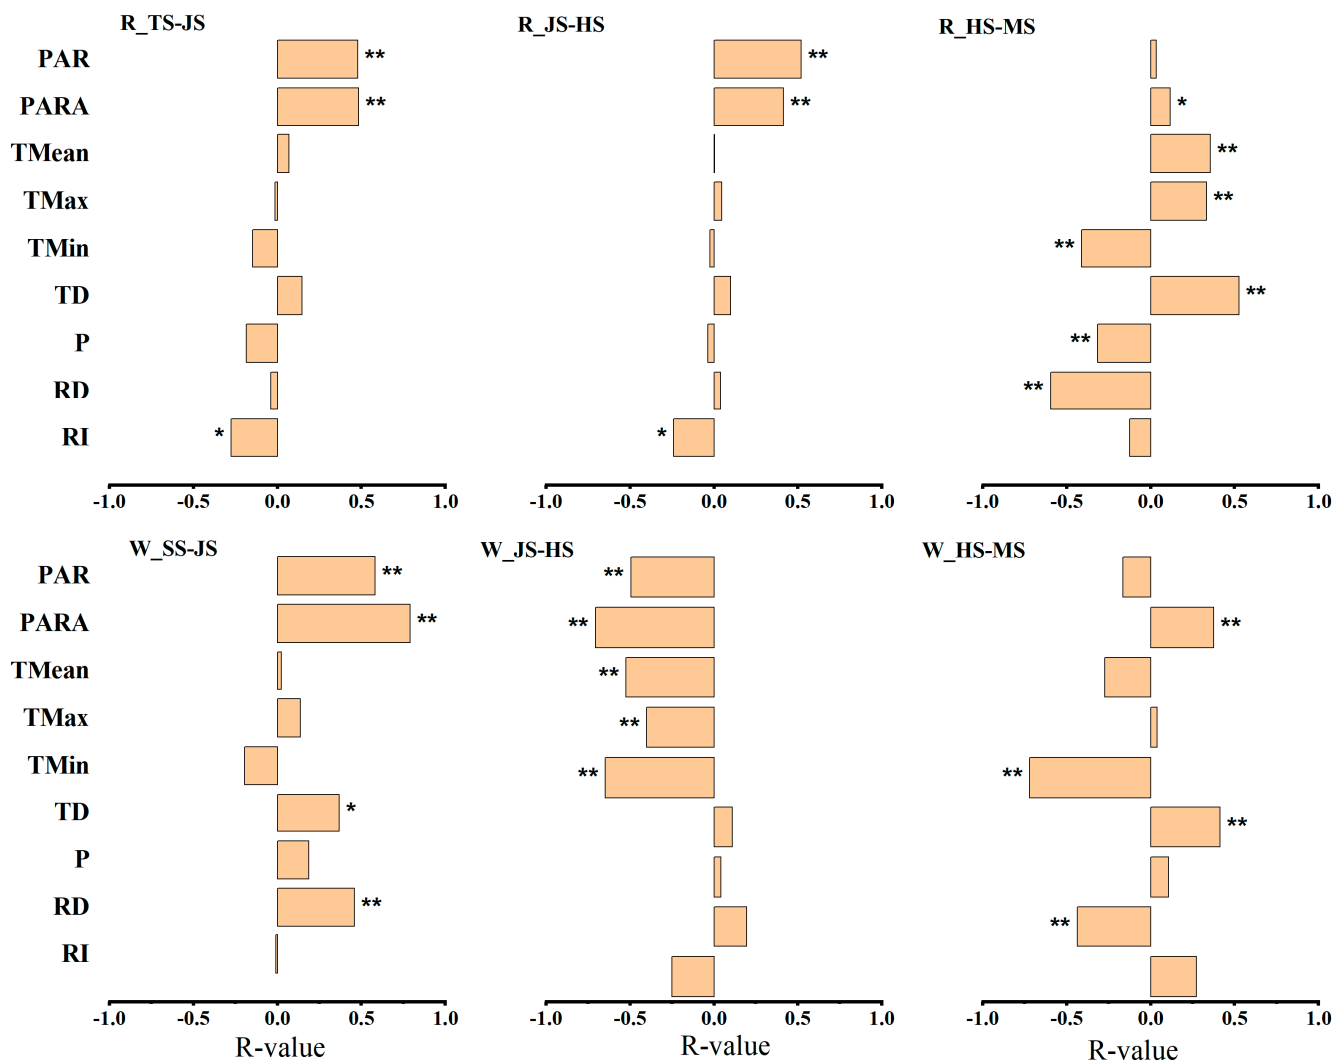

**Figure S1.** Correlation analysis between dry matter accumulation and meteorological parameters in the different growth stages of rice and wheat.

Note: R: rice; W: wheat; TP: transplantation stage; SS: sowing stage; JS: jointing stage; HS: heading stage; MS: maturity stage; PAR: photosynthetically active radiation; PARA: accumulation of photosynthetic active radiation; TMean: daily mean temperature; TMax: daily average maximum temperature; TMin: daily average minimum temperature; TD: temperature difference; P: precipitation; RD: number of rainy days; RI: rainfall intensity; \*:  $p < 0.05$ , \*\*:  $p < 0.01$ .
